# Supplementary material for: Deriving Dorsal Spinal Sensory Interneurons from Human Pluripotent Stem Cells
Source: PubMed Central journal article supplement — Stem Cell Reports. 2018 Jan 11;10(2):390–405. doi: 10.1016/j.stemcr.2017.12.012 (PMC5832443; doi:10.1016/j.stemcr.2017.12.012), 2018-01-11
Supplement: mmc1.pdf [file mmc1.pdf]

**Stem Cell Reports, Volume 10**

**Supplemental Information**

**Deriving Dorsal Spinal Sensory Interneurons from Human Pluripotent  
Stem Cells**

**Sandeep Gupta, Daniel Sivalingam, Samantha Hain, Christian Makkar, Enrique Sosa, Amander Clark, and Samantha J. Butler**

## Supplementary information

### Supplementary Figure 1: Retinoic acid induces a cervical HOX profile in hEBs

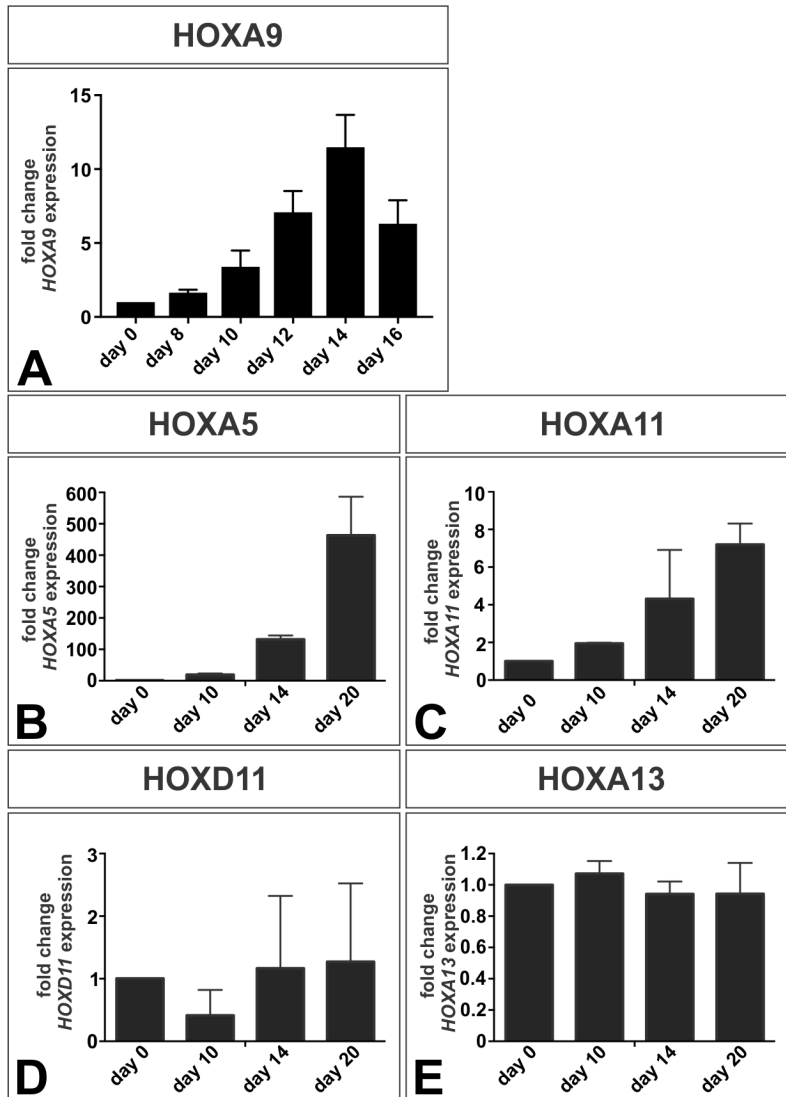

(A-E) RA-treated hEBs were assessed for the levels of *HOX* gene expression by RT-qPCR, which was normalized to day 0. By day 14-20 in the hESC differentiation protocol, there was significant increase in *HOXA9* (lower thoracic identity A,  $p < 0.04$ , day 0 is similar to day 14), *HOXA5* (cervical level, B,  $p < 0.030$ , day 0 versus day 20), and *HOXA11* (mid-lumbar level, C,  $p < 0.03$ , day 0 versus day 20) expression in the hESC-derived EBs. There were no significant

changes in *HOXD11* (lower lumbar level, D,  $p > 0.84$ , day 0 versus day 20) and *HOXA13* (sacral level, E,  $p > 0.24$  for day 0 versus day 20).

Data are represented as mean  $\pm$  SEM. Two biological replicates were performed; the qRT-PCR conditions were run in triplicate.

Supplementary Figure 2: BMP4 suppresses the dl2 fate in hEBs.

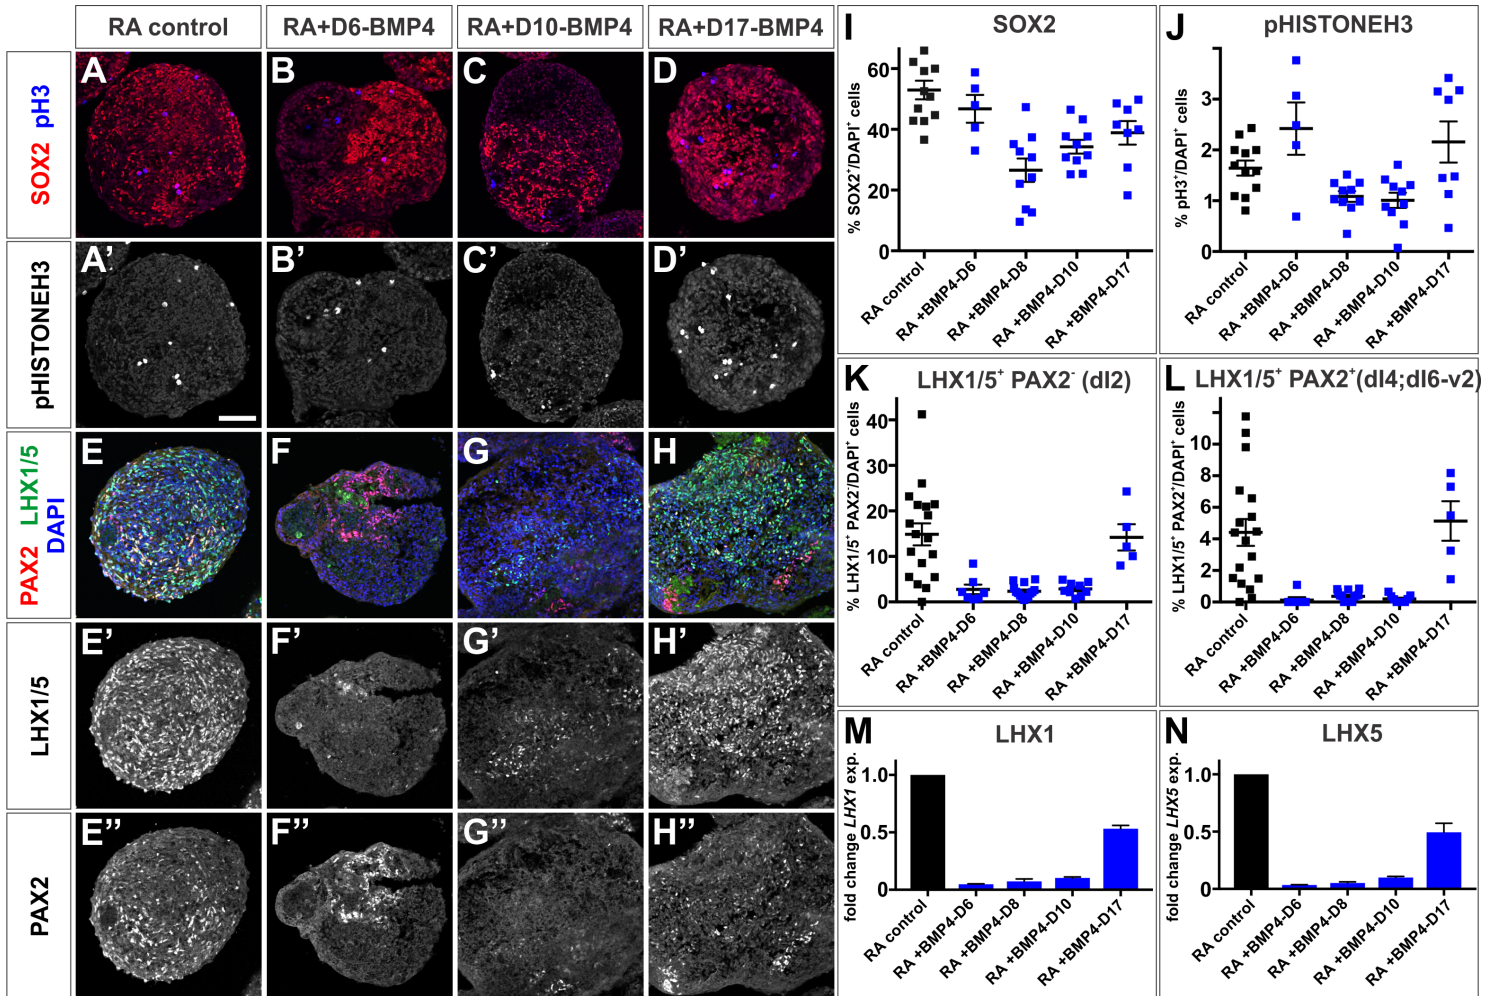

(A-D, I, J) By day 36 of the protocol, RA-treated hEBs still contain significant numbers of SOX2<sup>+</sup> progenitors and phospho-HISTONEH3<sup>+</sup> mitotic cells. The addition of BMP4, from day 8 on, significantly decreases the number of progenitors and dividing cells in hEBs (I, J; probability similar to RA control: p<0.0001, BMP4-D8; p<0.0003, BMP4-D10; p<0.016, BMP4-D17).

(E-H, K-N) RA treatment results in the generation of numerous LHX1/5<sup>+</sup> PAX2<sup>-</sup> cells (dl2) (E, E', K) and a few LHX1/5<sup>+</sup> PAX2<sup>+</sup> cells (dl4; dl6-v2) (E, E'', L). However, the specification of these cell types is suppressed by addition of BMP4 between day 6 and day 10 (dl2: F-G', K, p<0.0015, BMP4-D6; p<0.0001, BMP4-D8; p<0.0005, BMP4-D10; dl4, dl6-v2: p<0.0001 for all conditions) in hESCs derived EBs. By day 17, the addition of BMP4 no longer suppresses

dl2 identity (H-H", K;  $p > 0.9$ , L;  $p > 0.48$ ). The effect of BMP4 on dl2 fates was also observed in an RT-qPCR analysis of *LHX1* and *LHX5* expression (M, N).

Data are represented as mean  $\pm$  SEM. Two biological replicates were performed; the qRT-PCR conditions were run in triplicate and between 9-18 EBs were quantified for each condition, normalized to the total number of DAPI<sup>+</sup> cells and represented as the percent cell numbers.

Scale bar=100  $\mu$ m.

**Supplementary Figure 3: Biological replicates for upregulation of LHX2 and ISL1 mRNA in the directed differentiation protocol**

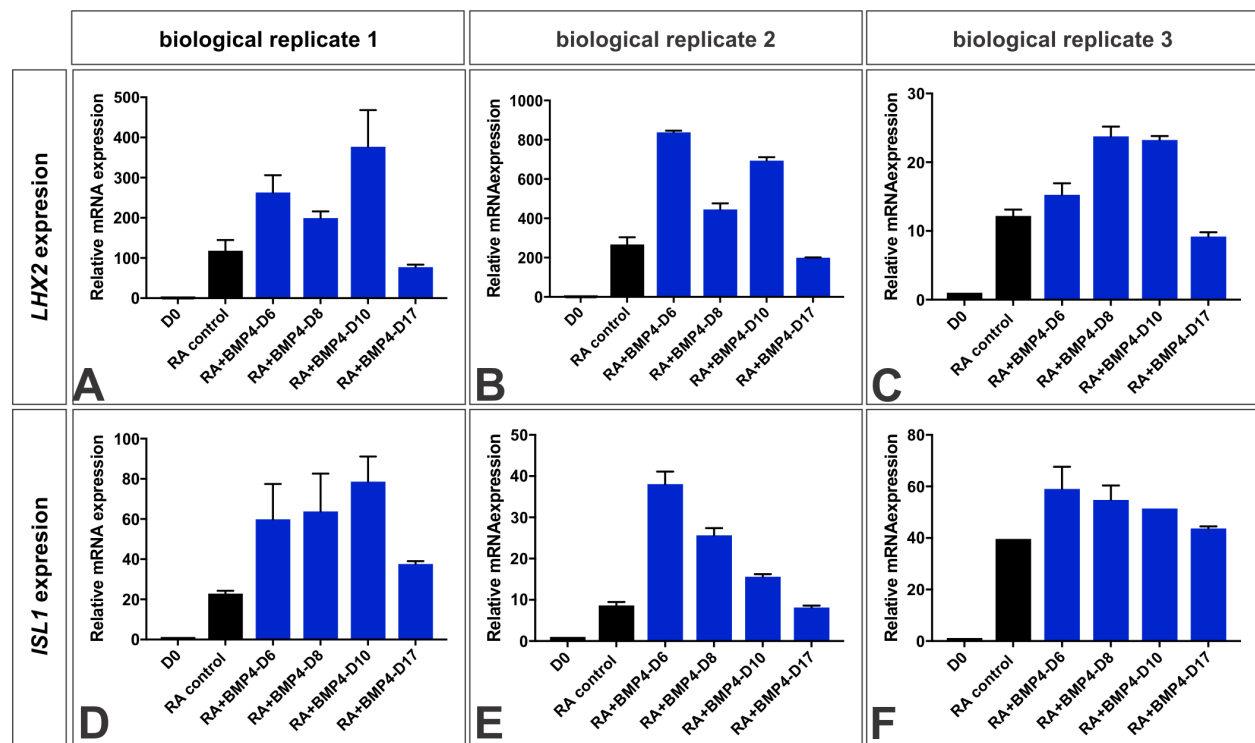

(A-F) RT-qPCR analysis of *LHX2* (A-C) and *ISL1* (D-F) expression in three biological replicates of the directed differentiation protocol. EBs were treated with RA, with BMP4 added at day 6, 8, 10 and 17. In each biological replicate *LHX2* and *ISL1* expression is upregulated after addition of BMP4, however there are marked differences in the magnitude of relative fold change. Three technical replicates were performed. Values are represented as mean $\pm$ SEM.

Supplementary Figure 4: Characterization of hESC-derived mechanosensory dI3 cells

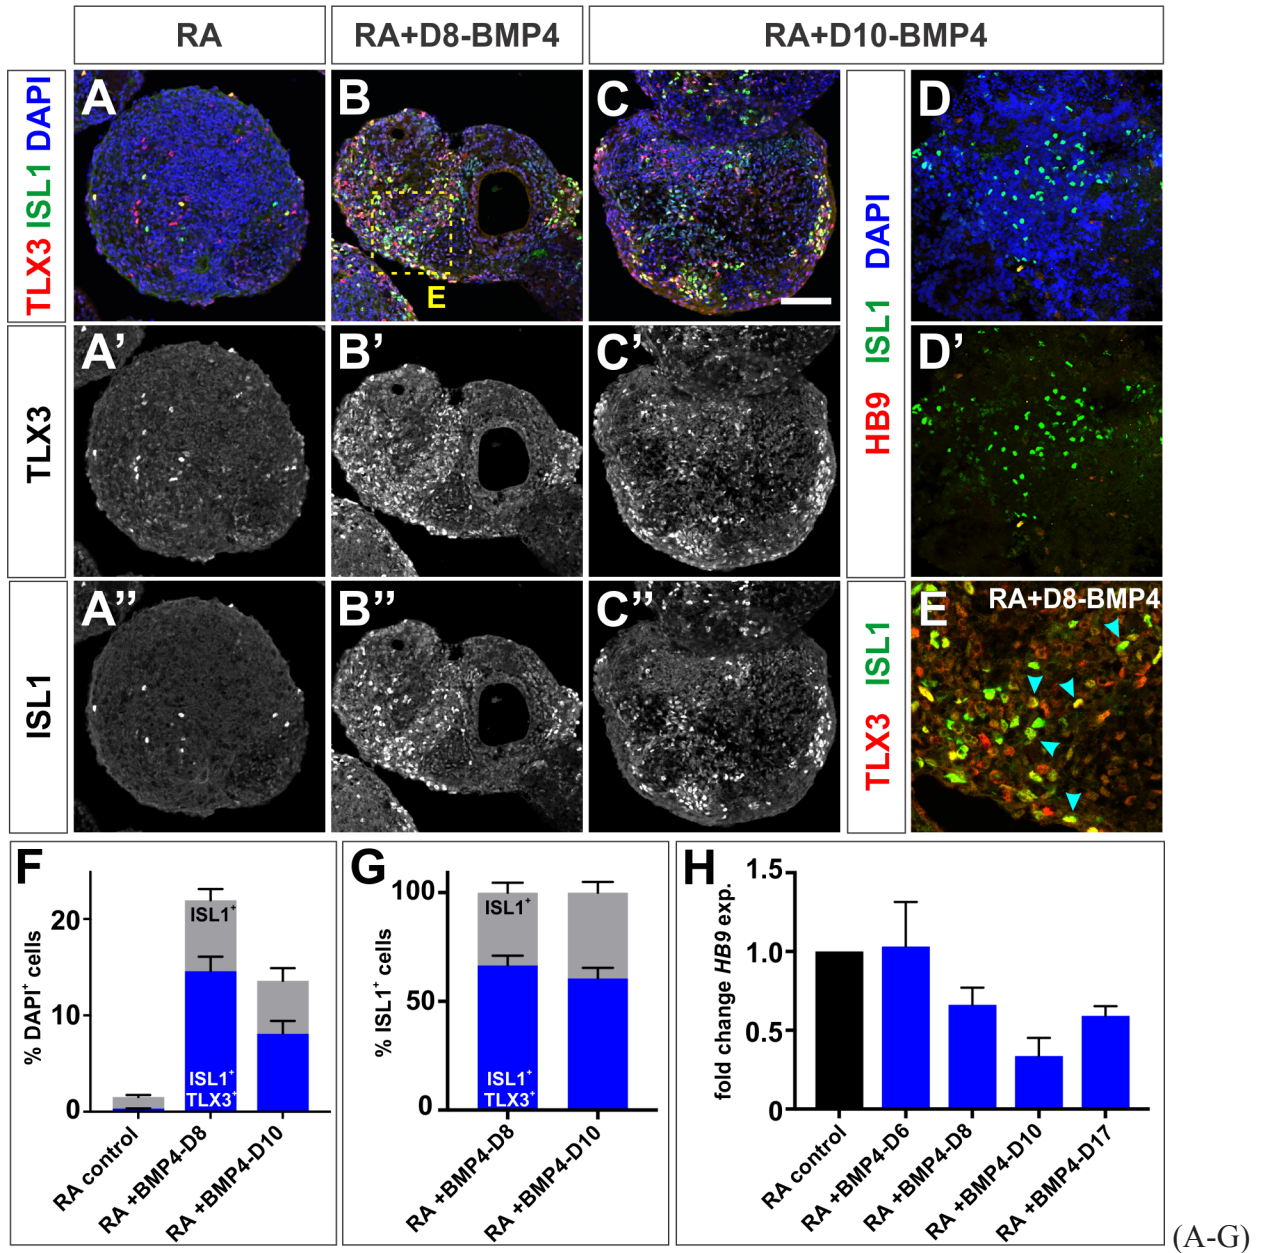

By day 36, BMP4 addition significantly increases the number of ISL1<sup>+</sup> TLX3<sup>+</sup> dI3 INs in the BMP4-D8 (B, E,  $p < 0.0001$  similar to RA control) and BMP4-D10 (C,  $p < 0.0001$ ) conditions compared to RA controls (A, F). ~60% of dI3s are double positive for ISL1 and TLX3 (G). In contrast, the ISL1<sup>+</sup> cells are not co-labeled by the spinal motor neuron marker HB9 (D) and a RT-qPCR analysis showed that there was no *HB9* mRNA enrichment in any of the BMP4 conditions (H). Thus, the hESC-derived ISL1<sup>+</sup> cells do not have a motor neuron identity.

Data are represented as mean  $\pm$  SEM. Two biological replicates were performed; the qRT-PCR conditions were run in triplicate and between 7-10 EBs were quantified for each condition. The number of ISL1<sup>+</sup> cells and ISL1<sup>+</sup> TLX3<sup>+</sup> cells were normalized to the number of DAPI<sup>+</sup> cells in D and to the total ISL1<sup>+</sup> cells in E.

Scale bar=100 $\mu$ m.



**Table 1: Primary Antibodies**

| Antigen | Species    | Dilution | Source                                          |
|---------|------------|----------|-------------------------------------------------|
| Sox2    | Goat       | 1:1000   | Santa Cruz Biotechnology (sc-17320)             |
| Pax3    | Goat       | 1:500    | R&D Systems (AF2457)                            |
| Lhx2    | Goat       | 1:250    | Santa Cruz Biotechnology (sc-19344)             |
| Isl1    | Goat       | 1:500    | R&D Systems (AF1837)                            |
| Sox1    | Goat       | 1:500    | Santa Cruz Biotechnology (sc-17318)             |
| Pax6    | Mouse      | 1:100    | Developmental studies Hybridoma Bank (AB528427) |
| Nanog   | Rabbit     | 1:200    | Cell Signaling Technology (D73G4)               |
| HoxA5   | Goat       | 1:1000   | Santa Cruz Biotechnology (sc-13199)             |
| Olig2   | Rabbit     | 1:300    | Milipore (AB9610)                               |
| Tuj1    | Mouse      | 1:1000   | BioLegend (801202)                              |
| Dcc     | Goat       | 1:200    | R&D System (AF844)                              |
| Robo3   | Goat       | 1:200    | R&D System (AF3076)                             |
| Tlx3    | Guinea pig | 1:200    | gift from Thomas Müller (Muller et al., 2005)   |
| Lhx1/5  | Mouse      | 1:20     | Developmental Studies Hybridoma Bank            |
| Pax2    | Rabbit     | 1:500    | Invitrogen                                      |

**Table 2: RT-qPCR primer sequences**

| Gene name | Primer sequence                                          |
|-----------|----------------------------------------------------------|
| Nanog     | For: CCCAGCCTTTACTCTTCCTA<br>Rev: CCAGGTTGAATTGTTCCAGGTC |

|                               |                                                              |
|-------------------------------|--------------------------------------------------------------|
| Sox2                          | For: CAAAGAAAAACGAGGGAAATGGG<br>Rev: TACCGGGTTTTCTCCATGCTG   |
| Sox1                          | For: GCGGTAACAACACTACAAAAAAGTTGTAA<br>Rev: GCGGAGCTCGTCGCATT |
| Pax6                          | For TTGAGCCATCACCAATCAGC<br>Rev: TTTCTCCACGGATGTTGCTG        |
| TUBB3 ( $\beta$ -III tubulin) | For: GGCCAAGGGTCACTACACG<br>Rev: GCAGTCGCAGTTTTCACACTC       |
| HoxA5                         | For: AAGTCATGACAACATAGGCGG<br>Rev: TTCAATCCTCCTTCTGCGGG      |
| Pax3                          | For: AGCACTGTACACCAAAGCAC<br>Rev: AAAATCCATGCCTGGTGCTG       |
| Olig2                         | For: CCCTAAAGGTGCGGATGCTT<br>Rev: ACCCGAAAATCTGGATGCGA       |
| Lhx2                          | For: TGGACCGAGGAACAAGTTGG<br>Rev: TCGCTCAGTCCACAAAAGT        |
| Isl1                          | For: GATTTGGAATGGCATGCGGC<br>Rev: GCGCATTTGATCCCGTACAA       |
| Atoh1                         | For: ACCAGCTGCGCAATGTTATC<br>Rev: TTTGTAGCAGCTCGGACAAG       |
| Ascl1                         | For: AGCTTCTCGACTTCACCAACTG<br>Rev: TGCTTCCAAAGTCCATTCGC     |
| FoxD3                         | For: CGGCCTCGAGCAACAAATG<br>Rev: AAATTGGGGAGAGGCAGAGTC       |
| Lhx1                          | For: CAACATGCGCGTCATTCAGG<br>Rev: ACTCGCTCTGGTAATCTCCG       |
| Lhx5                          | For: GCGTCATCCAGGTGTGGTTT<br>Rev: GGTGGACCCCAACATCTCAG       |

|        |                                                        |
|--------|--------------------------------------------------------|
| HoxA9  | For: GTCCCACGCTTGACACTCA<br>Rev: GCTGCTGGGTTATTGGGATCG |
| HoxD11 | For: CAGCAGCGCAGTTGCC<br>Rev: CGGTCAGTGAGGTTGAGCAT     |
| HoxA13 | For: CTGCCCTATGGCTACTTCGG<br>Rev: CCGGCGGTATCCATGTACT  |
| HoxA11 | For: CCCGCAGTCTCGTCCAATTT<br>Rev: AGGCTGTCTCGAAAACTGGT |

**Table 3.** Summary of the differentiation efficiencies.

|             | SOX2<br>(progenitor) | LHX2<br>(dI1) | LHX1/5 <sup>+</sup> PAX2 <sup>-</sup><br>(dI2) | ISL1<br>(dI3) | LHX1/5 <sup>+</sup> PAX2 <sup>+</sup><br>(dI4; dI6-v2) |
|-------------|----------------------|---------------|------------------------------------------------|---------------|--------------------------------------------------------|
| RA          | 53%                  | 8.5%          | 15%                                            | 1.5%          | 4.5%                                                   |
| RA+BMP4-D6  | 47%                  | 26%           | 3%                                             | 15%           | <0.2%                                                  |
| RA+BMP4-D8  | 26.5%                | 20%           | 2%                                             | 14.5%         | <0.5%                                                  |
| RA+BMP4-D10 | 34%                  | 18.5%         | 3%                                             | 8%            | <0.2%                                                  |
| RA+BMP4-D17 | 39%                  | 8%            | 14%                                            | 2%            | 5%                                                     |
